# Supplementary material for: Insulin Glargine Combined with Oral Antidiabetic Drugs for Asians with Type 2 Diabetes Mellitus: A Pooled Analysis to Identify Predictors of Dose and Treatment Response
Source: Springer Nature journal article supplement (doi:10.1007/s13300-018-0381-9), 2018-03-09
Supplement: MOESM1 [file 15523110]

**Table S1.** Patient disposition

| Category                                                     | N (%)      |
|--------------------------------------------------------------|------------|
| Number of included subjects                                  | 724        |
| Number of included studies                                   | 7          |
| <b>Number of subjects in each study (Asian population)</b>   |            |
| ATLAS                                                        | 403 (55.7) |
| GALAPAGOS                                                    | 198 (27.3) |
| 0579                                                         | 73 (10.1)  |
| 4001                                                         | 14 (1.9)   |
| 3502                                                         | 13 (1.8)   |
| 4041                                                         | 12 (1.7)   |
| 4002                                                         | 11 (1.5)   |
| <b>Number of subjects in each study (Chinese population)</b> |            |
| ATLAS                                                        | 150 (60.2) |
| GALAPAGOS                                                    | 99 (39.8)  |

**Table S2.** Parameter estimates and 95% confidence intervals for baseline predictors of Gla-100 dose at Week 24 following multivariate regression analyses

| Baseline covariate*         | All patients (N = 724) |         | Chinese patients (n = 249) |         |
|-----------------------------|------------------------|---------|----------------------------|---------|
|                             | Estimate (95% CI)      | P value | Estimate (95% CI)          | P value |
| Age, years                  | -0.26 (-0.39, -0.13)   | 0.0001  | -0.31 (-0.45, -0.16)       | <0.0001 |
| Sex, female vs male         | 1.55 (-0.51, 3.62)     | 0.1406  | 1.93 (-0.45, 4.31)         | 0.1108  |
| BMI, kg/m <sup>2</sup>      | 1.44 (1.18, 1.70)      | <0.0001 | 1.25 (0.90, 1.61)          | <0.0001 |
| Duration of diabetes, years | -0.23 (-0.41, -0.05)   | 0.0135  |                            |         |
| FPG, mmol/L                 | 1.62 (1.12, 2.11)      | <0.0001 | 1.43 (0.88, 1.98)          | <0.0001 |
| HbA <sub>1c</sub> , %       | 1.07 (-0.05, 2.18)     | 0.0602  |                            |         |
| Number of OADs              |                        |         | -4.78 (-7.94, -1.61)       | 0.0032  |

BMI, body mass index; CI, confidence interval; FPG, fasting plasma glucose; Gla-100, insulin glargine 100 U/mL; HbA<sub>1c</sub>, glycated hemoglobin; OADs, oral antidiabetic drugs.

\*Results are summarized for covariates included in the final model for each population. For the overall Asian population, the number of OADs prescribed at baseline did not satisfy the forward model entry selection criterion (from univariate to multivariate analysis) and hence was not included in the multivariate analysis. Similarly, for the Chinese patients, duration of diabetes and HbA<sub>1c</sub> at baseline both failed to satisfy the entry criterion from univariate to multivariate analyses. Baseline covariates not included in the multivariate analyses for both populations have been left blank.
